# Supplementary material for: Minimal functional domains of the core polarity regulator Dlg
Source: PubMed Central journal article supplement (PMC9346270; doi:10.1242/bio.059408), 2022-07-25
Supplement: biolopen-11-059408-s1.pdf [file biolopen-11-059408-s1.pdf]

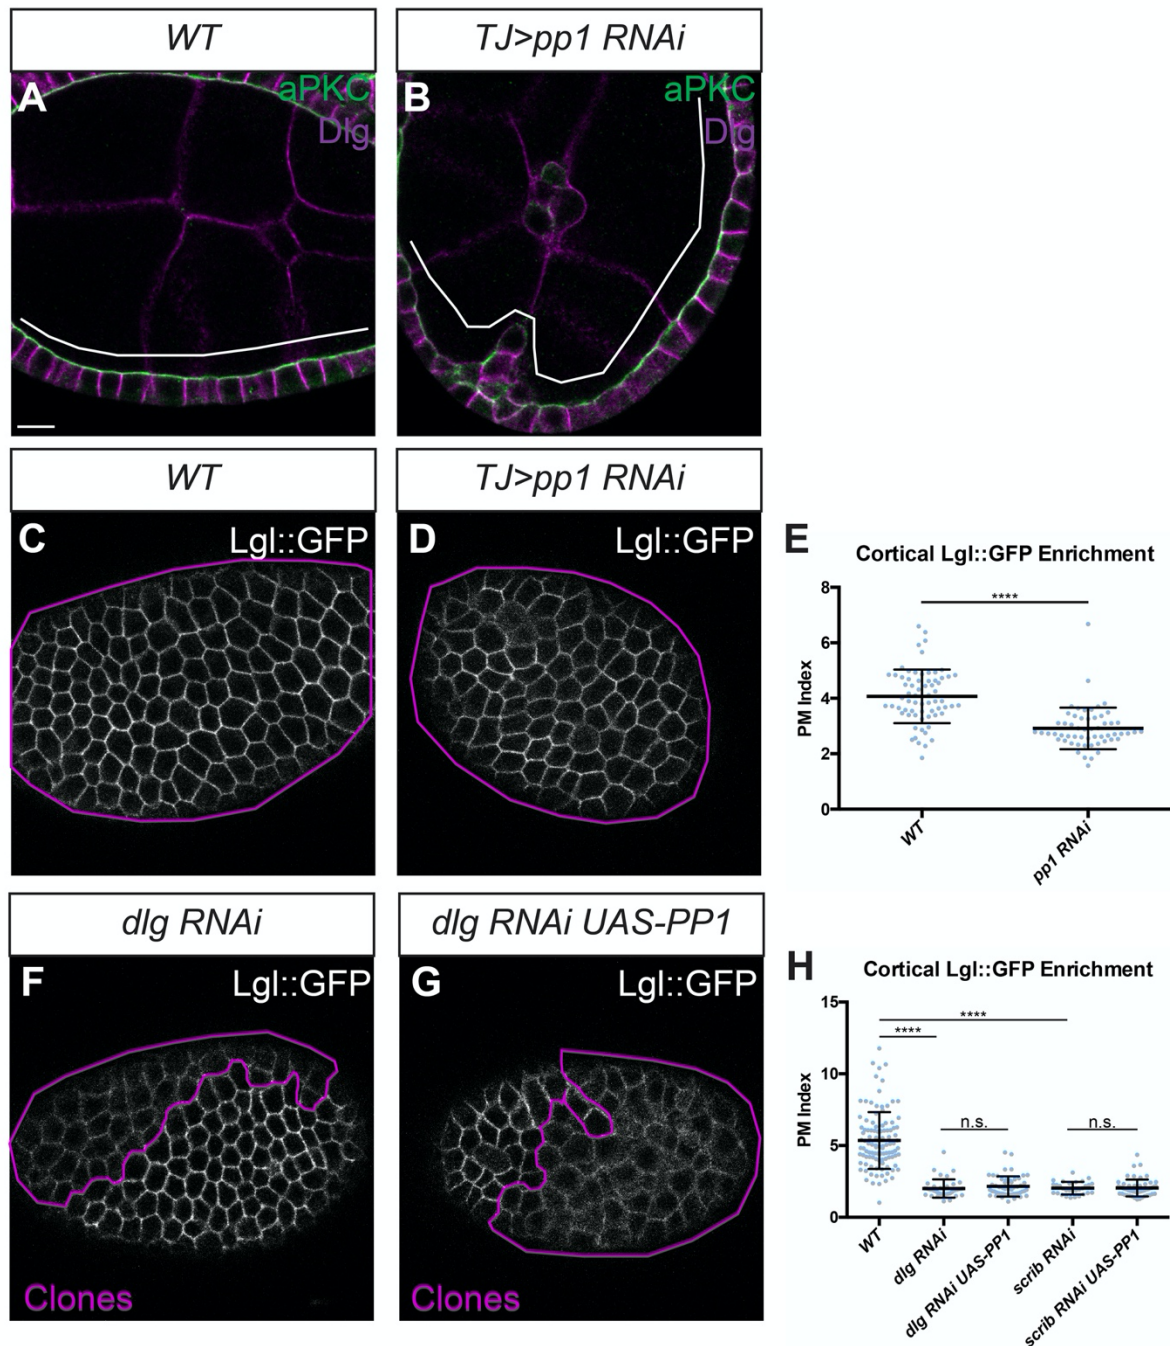

### Fig. S1. Lgl localization requires both PP1 and Scrib/Dlg

Compared to WT cells (A), *pp1*-depleted cells (B) exhibit mild polarity loss and occasional multilayering. Compared to WT cells (C), *pp1*-depleted cells display mild loss of cortical Lgl (D, also compare to *dlg*-depletion in F). (E) Quantification of Lgl localization. (F) *dlg*-depleted cells strongly mislocalize cortical Lgl and this is not rescued by overexpression of PP1 (G). (H) Quantification of Lgl localization. Scale bars, 10 $\mu$ m. White lines in (F-G) indicate flip-out GAL4 clones of given genotypes. (E) Two-tailed t-test with Welch's correction. (H) One-way ANOVA with Tukey's multiple comparisons test. Error bars indicate S.D. PM Index=cortical/cytoplasmic intensity. Data points are individual cell measurements. n.s. (not significant)  $P > 0.05$ , \*\*\*\* $P < 0.0001$ .

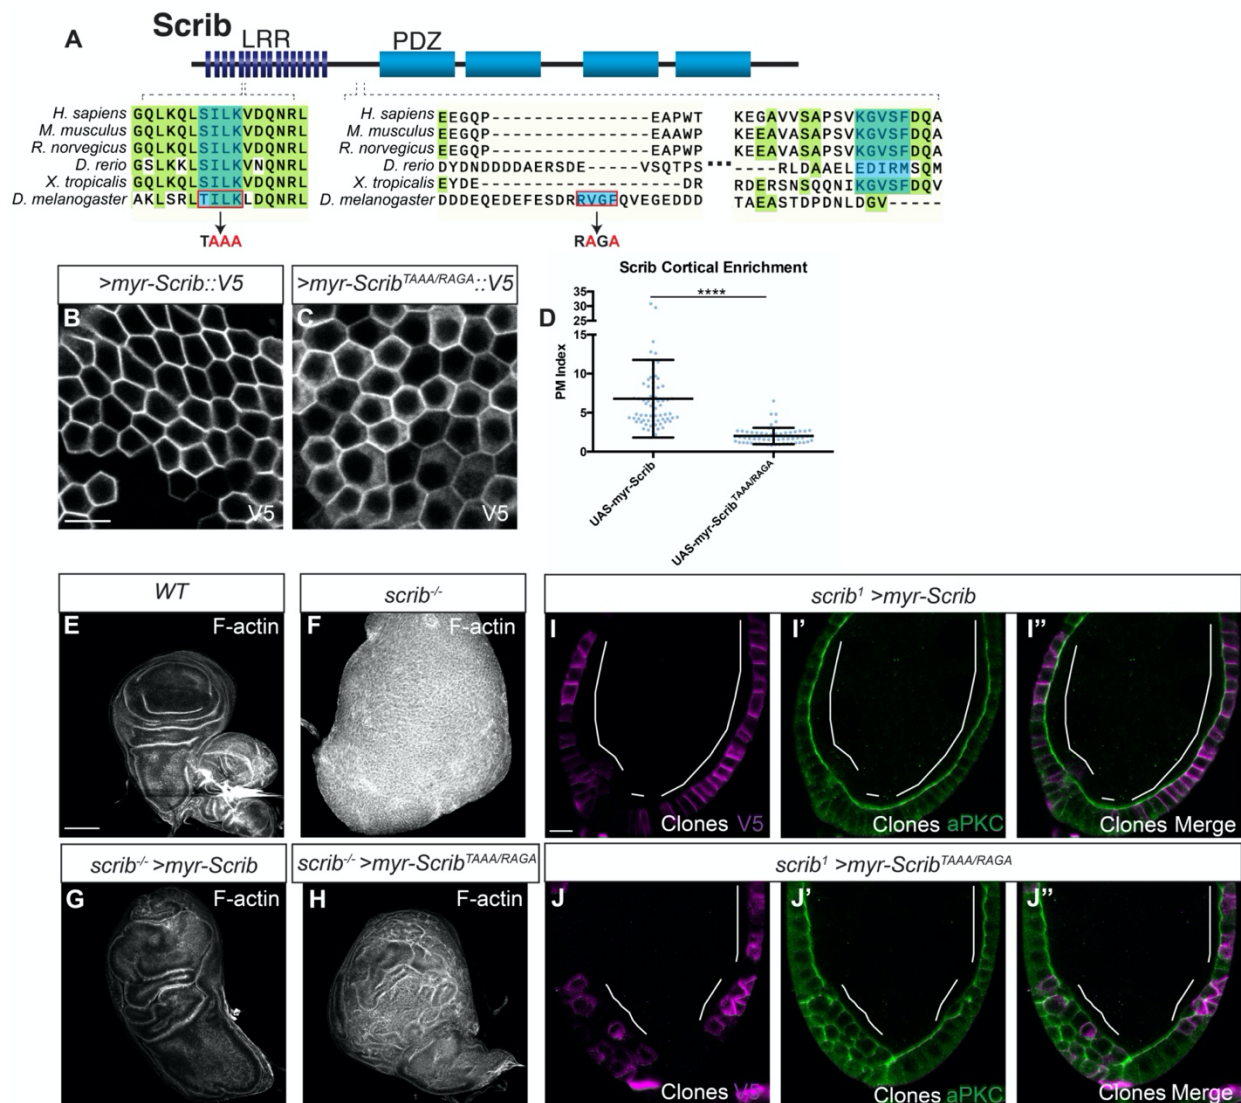

**Fig. S2. Scrib PP1-binding consensus motifs are partially required for function**

(A) Cartoon showing the Scrib protein domain composition and location of the SILK and RVxF motifs. Below: alignment showing conservation of the SILK motif and RVxF motifs. Note that in vertebrates (right), the RVxF motif is located slightly C-terminal to its position in insects (left). Red boxes indicate residues mutated in *myr-Scrib<sup>TAAA/RAGA</sup>* construct. Compared to WT *myr-Scrib* (B), *myr-Scrib<sup>TAAA/RAGA</sup>* (C) localizes less well to the cell cortex but is still enriched at the basolateral membrane, quantified in (D). Both constructs contain V5 epitope tags, used for detection. (E-H) Compared to WT wing discs (E), *scrib* mutant wing discs overgrow and form tumors (F). Overexpression of *myr-Scrib* largely rescues these phenotypes (G), while expression of *myr-Scrib<sup>TAAA/RAGA</sup>* only partially rescues the *scrib* mutant phenotype (H). (I-J) Compared to *myr-Scrib* (I), *myr-Scrib<sup>TAAA/RAGA</sup>* (J) provides less efficient rescue of *scrib* mutant: *myr-Scrib* shows complete restoration of the monolayered epithelium in 78.6% (n=14) of follicles, compared to complete restoration in 36.8% (n=19) of *myr-Scrib<sup>TAAA/RAGA</sup>*-rescued follicles. Scale bars, 10µm, except E-H, 100µm. White lines in (I-J) indicate MARCM clones of given genotypes, (B-C) are flip-out GAL4 clones. (D) Two-tailed t-test with Welch's correction. Error bars indicate S.D. PM Index=cortical/cytoplasmic intensity. Data points are individual cell measurements. \*\*\*\*P < 0.0001.

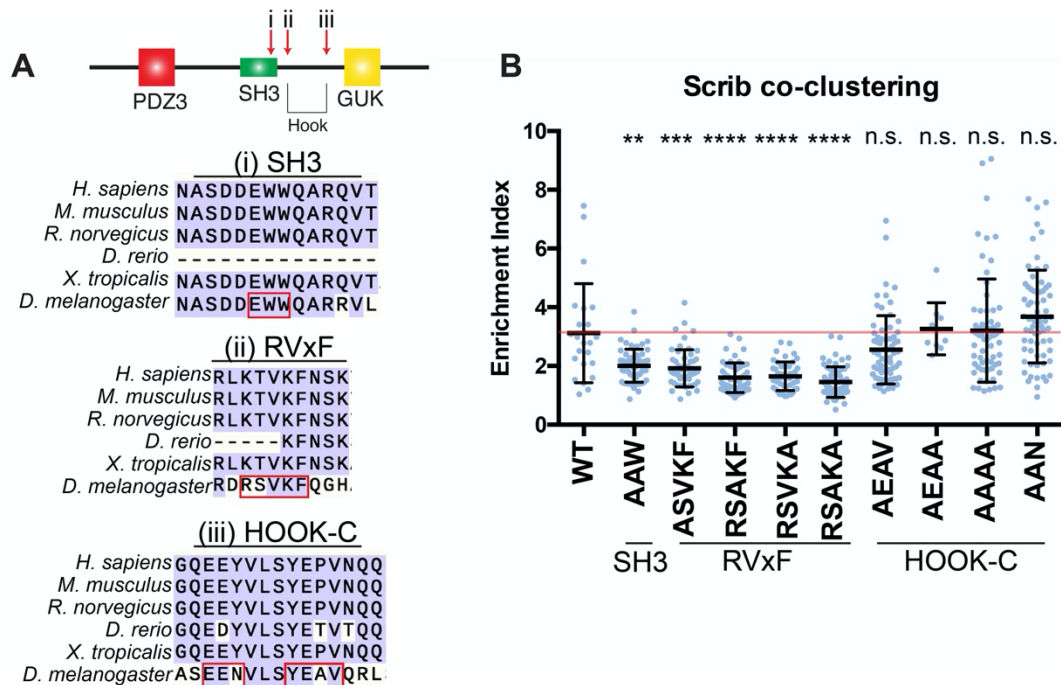

### Fig. S3. In depth examination of Dlg SH3 and HOOK domains

(A) Schematic of the Dlg domains used in the Ed-Dlg<sup>PDZ3-SH3-HOOK-GUK</sup> construct, with sequence alignments showing conservation of the SH3 and HOOK domain sequences chosen for study. Motifs targeted for mutation are indicated by red outlines. Arrows in cartoon indicate relative locations of targeted sequences in the protein. (B) Quantification of Scrib recruitment to the polarity site in S2 induced polarity assay. Compared to the WT Ed-Dlg<sup>PDZ3-SH3-HOOK-GUK</sup> construct, which does recruit Scrib, the SH3 mutant AAW construct has reduced ability to recruit Scrib. Similarly, all four constructs targeting single residues of the RVxF motif show equally impaired ability to recruit Scrib. However, the four constructs targeting conserved residues in the C-terminal HOOK domain do not impair Scrib recruitment. Red line indicates the average for the WT construct control. One-way ANOVA with Tukey's multiple comparisons test. Error bars indicate S.D. Data points are individual cell clusters. Statistical tests are comparisons to the Ed-Dlg<sup>PDZ3-SH3-HOOK-GUK</sup> control construct. Enrichment index = contact site/non-contact site intensity. n.s. (not significant)  $P > 0.05$ , \*\* $P < 0.01$ , \*\*\* $P < 0.001$ , \*\*\*\* $P < 0.0001$ .

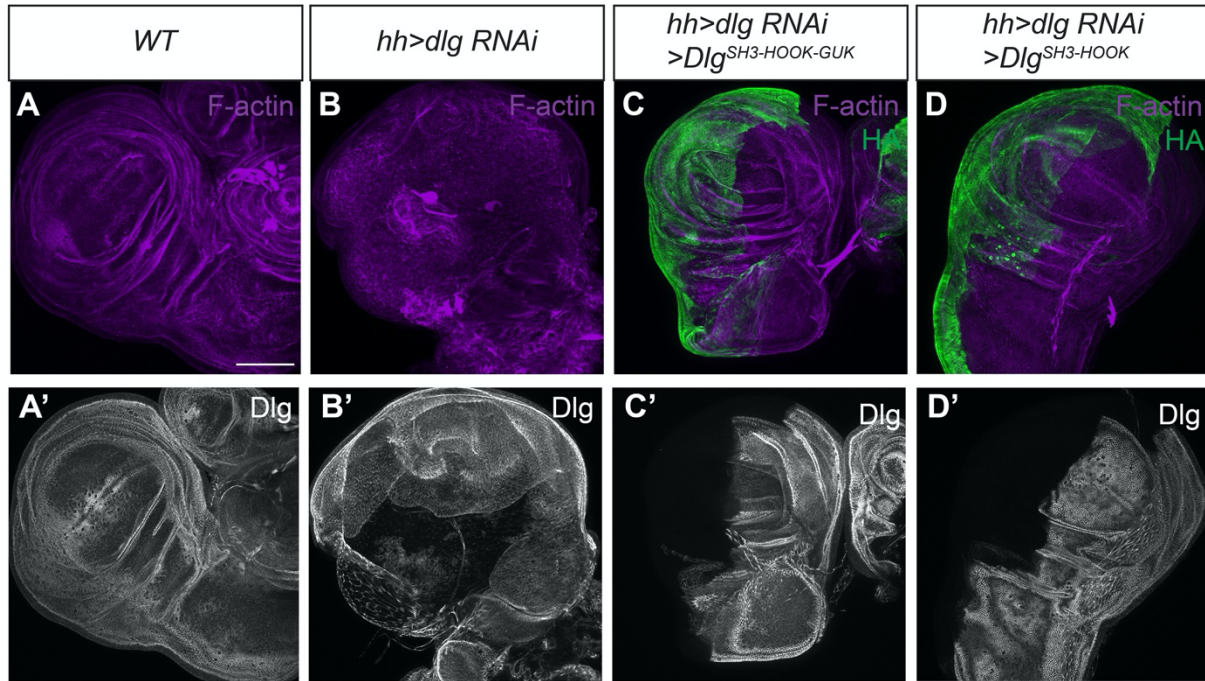

**Fig. S4. Validation of RNAi rescue approach for minimal Dlg constructs**

(A-D) Knocking down *dlg* in the posterior half of the wing disc using an RNAi construct targeting PDZ2-encoding sequences (B) causes polarity loss and disrupted epithelial architecture. These phenotypes are fully rescued by co-expression of  $Dlg^{SH3-HOOK-GUK}$  (C) and  $Dlg^{SH3-HOOK}$  (D), and neither constructs is targeted by the RNAi reagent used to deplete endogenous Dlg (C', D'). Scale bars, 100 $\mu$ m.

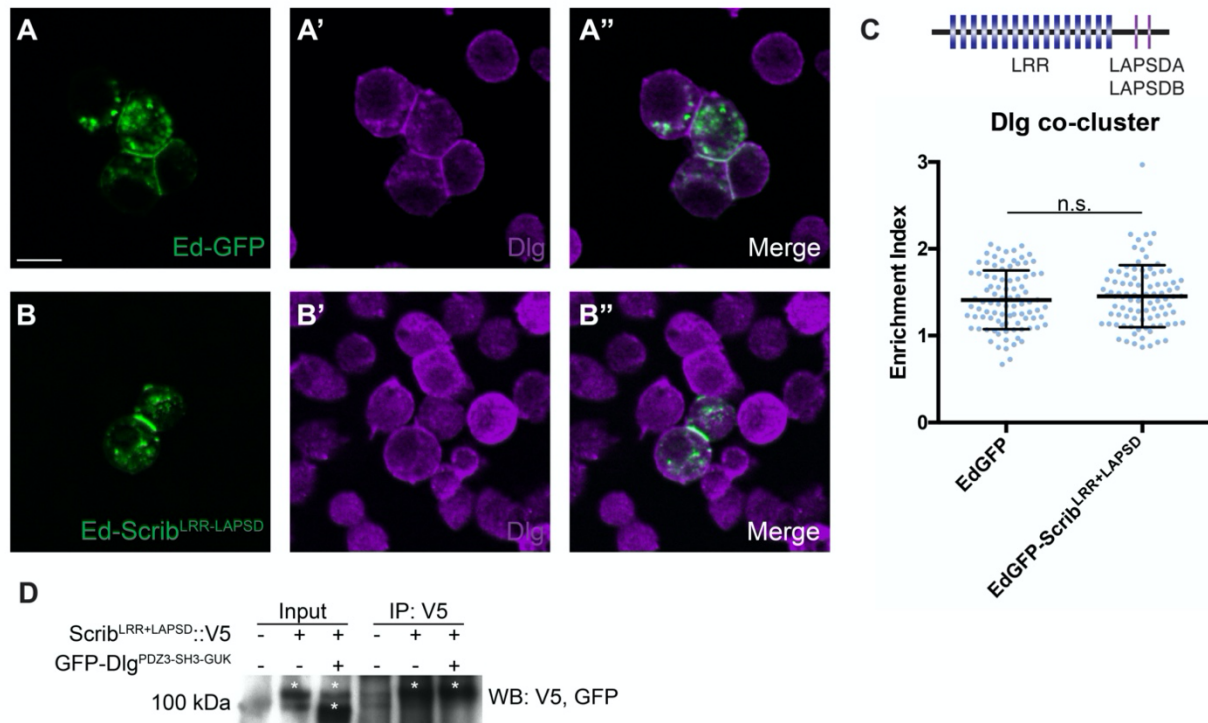

### Fig. S5. Using S2 cell induced polarity to study Scrib-Dlg interaction

(A) Ed-GFP expression in S2 cells allows induction of a polarity domain where cells adhere. (B) Fusing the Scrib LRR+LAPSD domains to Ed creates a domain of polarized Scrib. (C) Schematic of the Scrib domains used in the Ed-Scrib<sup>LRR+LAPSD</sup> construct. Quantification of Dlg enrichment shows that Scrib cannot recruit Dlg to the polarity site. (D) Co-IP assay of Scrib<sup>LRR+LAPSD</sup> and Dlg<sup>PDZ3-SH3-HOOK-GUK</sup> from S2 cells fails to detect interaction between these proteins. Scale bars, 10µm. (C) Two-tailed t-test with Welch's correction. Error bars indicate S.D. Data points are individual cell clusters. Enrichment index = contact site/non-contact site intensity. n.s. (not significant).

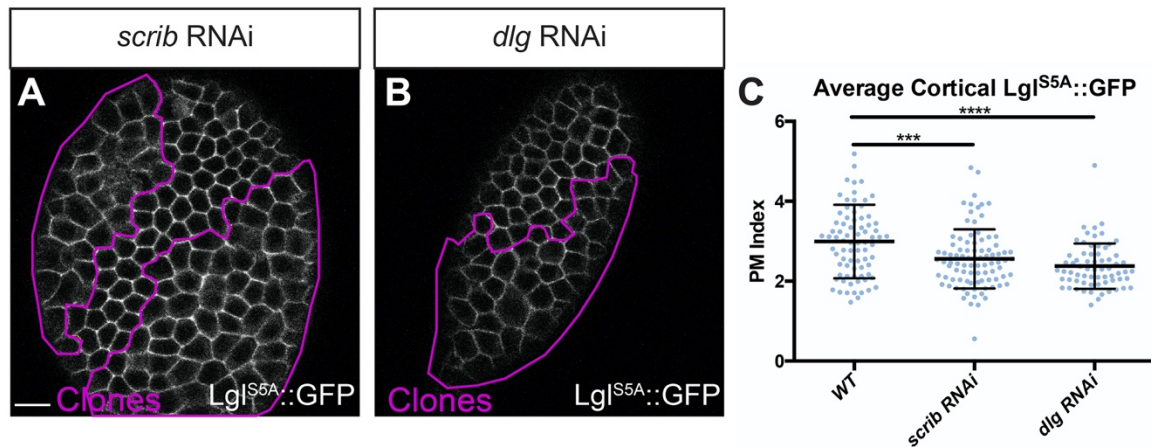

### Fig. S6. Scrib and Dlg protection of Lgl is partly independent of phosphorylation

(A-B) Compared to its localization in WT cells, non-phosphorylatable Lgl<sup>S5A</sup> exhibits a slight, but significant, reduction in cortical levels in *scrib* RNAi (A) and *dlg* RNAi expressing cells (B). (C) Quantification of Lgl<sup>S5A</sup>::GFP levels. *scrib* or *dlg* RNAi both significantly reduce Lgl<sup>S5A</sup> cortical levels compared to WT cells. Scale bars, 10µm. White lines indicate flip-out GAL4 clones of given genotypes. PM Index=cortical/cytoplasmic intensity. Data points represent individual cell measurements. Error bars represent S.D. (C) One-way ANOVA with Dunnett's multiple comparisons test. \*\*\*P < 0.001, \*\*\*\*P < 0.0001.

**Table S1. Key Resources**

| Reagent                                            | Reference and Source                                            |
|----------------------------------------------------|-----------------------------------------------------------------|
| <b>Drosophila stocks</b>                           |                                                                 |
| <i>UAS-Dlg<sup>WT</sup>::HA</i>                    | (Sharp et al., 2021)                                            |
| <i>UAS-Dlg<sup>ASAKA</sup>::HA</i>                 | This study                                                      |
| <i>UAS-Dlg<sup>SH3-HOOK</sup>::HA</i>              | This study                                                      |
| <i>UAS-Dlg<sup>SH3-HOOK-GUK</sup>::HA</i>          | This study                                                      |
| <i>UAS-myr-Scrib::V5</i>                           | (Khoury and Bilder, 2020)                                       |
| <i>UAS-myr-Scrib<sup>TAAA/RAGA</sup>::V5</i>       | This study                                                      |
| <i>dlg<sup>m52</sup></i>                           | (Perrimon, 1988)                                                |
| <i>dlg<sup>m30</sup></i>                           | (Woods and Bryant, 1989)                                        |
| <i>dlg<sup>40.2</sup></i>                          | (Mendoza-Topaz et al., 2008)                                    |
| <i>scrib<sup>1</sup></i>                           | (Bilder and Perrimon, 2000)                                     |
| <i>scrib<sup>2</sup></i>                           | (Zeitler et al., 2004)                                          |
| <i>UAS-dlg RNAi HMS01954</i>                       | Bloomington Drosophila Stock Center (BDSC): 39035               |
| <i>UAS-scrib RNAi HMS01993</i>                     | BDSC: 39073                                                     |
| <i>UAS-Pp1-87B RNAi HMS00409</i>                   | BDSC: 32414                                                     |
| <i>UAS-Pp1-87B::HA</i>                             | BDSC: 24098                                                     |
| <i>UASp-Sds22::GFP</i>                             | BDSC: 65851                                                     |
| <i>UASp-Scrib::GFP</i>                             | (Zeitler et al., 2004)                                          |
| <i>UAS-EGFP::Dlg</i>                               | (Koh et al., 1999)                                              |
| <i>UAS-Lgl::GFP</i>                                | (Wirtz-Peitz et al., 2008)                                      |
| <i>UAS-Lgl<sup>KAFA</sup>::GFP</i>                 | (Moreira et al., 2019), Generously provided by E. Morais de Sá. |
| <i>Lgl::GFP</i>                                    | (Dong et al., 2015), Generously provided by Y. Hong.            |
| <i>Lgl<sup>S5A</sup>::GFP</i>                      | (Dong et al., 2015), Generously provided by Y. Hong             |
| <i>act&gt;y+&gt;GAL4 UAS-his::RFP</i>              | BDSC: 30558                                                     |
| <i>tub-GAL80 FRT19A; act-GAL4 UAS-GFP</i>          | (Lee and Luo, 1999), BDSC: 42726, 5134                          |
| <i>tj-GAL4</i>                                     | Kyoto Stock Center: 104055                                      |
| <i>hh-GAL4</i>                                     | (Tanimoto et al., 2000)                                         |
| <i>D174-GAL4</i>                                   | (Sharp et al., 2021)                                            |
| <b>Plasmids</b>                                    |                                                                 |
| pMT-Ed-GFP                                         | (Johnston et al., 2009), Generously provided by C. Johnston.    |
| pMT-Ed-GFP-Dlg <sup>PDZ3-SH3-HOOK-GUK</sup>        | (Garcia et al., 2014), Generously provided by C. Johnston.      |
| pMT-Ed-GFP-Dlg <sup>SH3-GUK,ΔHOOK</sup>            | Generously provided by C. Johnston.                             |
| pMT-Ed-GFP-Dlg <sup>SH3-GUK</sup>                  | This study                                                      |
| pMT-Ed-GFP-Dlg <sup>PDZ3-SH3-HOOK</sup>            | This study                                                      |
| pMT-Ed-GFP-Dlg <sup>SH3</sup>                      | This study                                                      |
| pMT-Ed-GFP-Dlg <sup>HOOK</sup>                     | This study                                                      |
| pMT-Ed-GFP-Dlg <sup>SH3-HOOK</sup>                 | This study                                                      |
| pMT-Ed-GFP-Dlg <sup>PDZ3-SH3-HOOK-GUK[m30]</sup>   | This study                                                      |
| pMT-Ed-GFP-Dlg <sup>PDZ3-SH3-HOOK-GUK[ASAKA]</sup> | This study                                                      |
| pMT-Ed-GFP-Dlg <sup>PDZ3-SH3-HOOK-GUK[ASVKF]</sup> | This study                                                      |

|                                                             |                                                          |
|-------------------------------------------------------------|----------------------------------------------------------|
| pMT-Ed-GFP-Dlg <sup>PDZ3-SH3-HOOK-GUK[RS AKF]</sup>         | This study                                               |
| pMT-Ed-GFP-Dlg <sup>PDZ3-SH3-HOOK-GUK[RSVKA]</sup>          | This study                                               |
| pMT-Ed-GFP-Dlg <sup>PDZ3-SH3-HOOK-GUK[RSAKA]</sup>          | This study                                               |
| pMT-Ed-GFP-Dlg <sup>PDZ3-SH3-HOOK-GUK[AEAV]</sup>           | This study                                               |
| pMT-Ed-GFP-Dlg <sup>PDZ3-SH3-HOOK-GUK[AEEA]</sup>           | This study                                               |
| pMT-Ed-GFP-Dlg <sup>PDZ3-SH3-HOOK-GUK[AAAA]</sup>           | This study                                               |
| pMT-Ed-GFP-Dlg <sup>PDZ3-SH3-HOOK-GUK[AAN]</sup>            | This study                                               |
| pMT-Ed-GFP-Dlg <sup>PDZ3-SH3-HOOK-GUK[AAW]</sup>            | This study                                               |
| pMT-Ed-GFP-Scrib <sup>LRR+LAPSD</sup>                       | This study                                               |
| pMT-Scrib <sup>LRR+LAPSD::V5</sup>                          | This study                                               |
| pMT-GFP::Dlg <sup>PDZ3-SH3-HOOK-GUK</sup>                   | This study                                               |
| <b>Antibodies</b>                                           |                                                          |
| Mouse anti-Dlg (1:100 IHC)                                  | Developmental Studies Hybridoma Bank (DSHB): 4F3         |
| Rabbit anti-aPKC (1:200 IHC)                                | Santa Cruz Biotech: sc-216                               |
| Guinea pig anti-Scrib (1:500 IHC)                           | (Bilder and Perrimon, 2000)                              |
| Rabbit anti-HA tag C29F4 (1:500 IHC, 1:10,000 WB, 1:200 IP) | Cell Signaling Technologies (CST): #3724                 |
| Mouse anti-HA tag 6E2 (1:10,000 WB)                         | CST: #2367                                               |
| Mouse anti-HA tag 2-2.2.14 (1:200 IP)                       | Invitrogen: 26183                                        |
| Rabbit anti-GFP (1:5000 WB)                                 | Origene: TP-401                                          |
| Mouse anti-GFP JL-8 (1:10,000 WB)                           | Clontech: 632380                                         |
| Mouse anti-V5 (1:500 IHC, 1:200 IP, 1:5000 WB)              | Invitrogen: R960-25                                      |
| <b>Primers</b>                                              |                                                          |
| myrScrib_silk_F                                             | tgaataggaattgggtaccatgggtaactgcctcaccac                  |
| myrScrib_Silk_R                                             | tctgatccaacgcggcagcagtcagctc                             |
| myrScrib_rvxf_F                                             | tgctgccggttgatcagaatcgattgcagcgggtgaacgatac              |
| myrScrib_Rvxf_R                                             | cctccacttggcgccagcggcgcgatc                              |
| myrScrib_Agel_F                                             | cgctggcgccaagtggagggcgaagatg                             |
| myrScrib_Agel_R                                             | ggtacgacggggagcgggcaccggttgaccgtggaactgtctatc            |
| Nterm_Dlg_F                                                 | actctgaataggaattggctcgagcaaaATGACAACGAGGAA<br>AAAGAAGCGC |
| Nterm-Dlg-RVxF                                              | tggGCcttaGcgctgGCgtccctagctcgattttgcg                    |
| Dlg-RVxF-Cterm                                              | gacGCCAGCgCtaagGCccagggacatgcggcag                       |
| Dlg_Cterm_R                                                 | ggttccttcaaaagatcctctagaatcTTAAGCGTAGTCTGGG<br>AC        |
| Dlg-SH3_for                                                 | Actctgaataggaattggctcgagcaaaatgcagtaccgcccagagg<br>ag    |



|                                 |                                    |
|---------------------------------|------------------------------------|
| Dlg-SH3-HOOK_rev                | Ccgactgggagtagttgatggacaaacgctgtac |
| Dlg-Cterm_for                   | catcaactactcccagtcgggaccaacc       |
| Ed-PDZ3-SH3-HOOK-GUK m30 F      | TGTGCGCGCCCCGTTTGACTACG            |
| Ed-PDZ3-SH3-HOOK-GUK m30 R      | TACAGCGATCGCTTTTGCG                |
| Ed-PDZ3-SH3-HOOK-GUK ASAKA F    | TAAGGCCAGGGACATGCGGCAGCT           |
| Ed-PDZ3-SH3-HOOK-GUK ASAKA R    | GCGCTGGCGTCCCTAGCTCGCATTTTGC       |
| Ed-PDZ3-SH3-HOOK-GUK delPDZ3 F  | GAGGAGTACAATCGCTTCG                |
| Ed- PDZ3-SH3-HOOK-GUK delPDZ3 R | GCGCGGTTCTCTGGTTAT                 |
| Ed- PDZ3-SH3-HOOK-GUK delGUK F  | TCCCAGTCGGGACCAACC                 |
| Ed- PDZ3-SH3-HOOK-GUK delGUK R  | GTAGTTGATGGACAAACGCTGTAC           |
| Ed- deltaSH3_F                  | CGAGCTAGGGACCGCAGC                 |
| Ed- deltaSH3_R                  | TTGCGTGGTGCAGCAGC                  |
| Ed- ASVKF_F                     | TAAGTTCCAGGGACATGCGGCAGCT          |
| Ed- ASVKF_R                     | ACGCTGGCGTCCCTAGCTCGCATTTTGC       |
| Ed- RSAKF_F                     | TAAGTTCCAGGGACATGCGGCAGCT          |
| Ed- RSAKF_R                     | GCGCTGCGGTCCCTAGCTCGCATTTTGC       |
| Ed- RSVKA_F                     | TAAGGCCAGGGACATGCGGCAGCT           |
| Ed- RSVKA_R                     | ACGCTGCGGTCCCTAGCTCGCATTTTGC       |
| Ed- RSAKA_F                     | TAAGGCCAGGGACATGCGGCAGCT           |
| Ed- RSAKA_R                     | GCGCTGCGGTCCCTAGCTCGCATTTTGC       |
| Ed- AAW661/2_F                  | GTGGCAGGCACGACGAGTTCTC             |
| Ed- AAW661/2_R                  | GCTGCATCGTCGGAGGCATTGGT            |
| Ed- EEN768_F                    | GAACGTGTTGTCCTACGAGGCC             |
| Ed- EEN768_R                    | GCCGCGGAAGCTCCTTCAGCATTG           |
| Ed- AEAV_F                      | CGTGTTGTCCGCAGAGGCCGTACAGC         |
| Ed- AEAV_R                      | TTCTCCTCGGAAGCTCCT                 |

|                                           |                   |                                               |
|-------------------------------------------|-------------------|-----------------------------------------------|
| Ed-AEAA_F                                 | PDZ3-SH3-HOOK-GUK | GCCGCACAGCGTTTGTCCATCAAC                      |
| Ed-AEAA_R                                 | PDZ3-SH3-HOOK-GUK | CTCTGCGGACAACACGTTCTCCTC                      |
| Ed-AAAA_F                                 | PDZ3-SH3-HOOK-GUK | GCCGCACAGCGTTTGTCCATCAAC                      |
| Ed-AAAA_R                                 | PDZ3-SH3-HOOK-GUK | CGCTGCGGACAACACGTTCTCCTC                      |
| Ed_scrib_Gibson_F                         |                   | gcatggacgagctgtacaagctatgttcaagtcattcccatcttc |
| Ed_scrib_Gibson_R                         |                   | ccttcgaagggccctctagagtcggtgctagcctctgc        |
| GFP_fwd                                   |                   | ctactagtccagtggtggtgagcaagggcgag              |
| GFP_rev                                   |                   | tgctgacagcgatctctgtacagctcgc                  |
| PDZ3-SH3-HOOK-GUK_fwd (for cytosolic Dlg) |                   | caagagatccgctgtcagcaccgaggatataac             |
| PDZ3-SH3-HOOK-GUK_rev (for cytosolic Dlg) |                   | aatggtgatggtgatgatcatagagattccttgaaggtac      |
| scrib_fwd (for cytosolic Scrib)           |                   | ctactagtccagtggtggtgagcaagtcattcccatcttcaag   |
| scrib_rev (for cytosolic Dlg)             |                   | ccttcgaagggccctctagacgcgctggtgctagcctct       |

**Table S2. Scrib and Dlg transgenic constructs**

| Construct                                                 | Description                                     |
|-----------------------------------------------------------|-------------------------------------------------|
| Dlg <sup>ASAKA</sup>                                      | RSVKF 675-679 to ASAKA                          |
| DlgSH3-HOOK                                               | Fragment encompassing aa564-784+961-975         |
| DlgSH3-HOOK-GUK                                           | Fragment encompassing aa564-975                 |
| myr-Scrib <sup>TAAA/RAGA</sup>                            | TILK 286-289 to TAAA and RVGF 621-624 to RAGA   |
| pMT-Ed-GFP-Dlg <sup>PDZ3-SH3-HOOK-GUK</sup>               | Fragment encompassing aa473-975                 |
| pMT-Ed-GFP-Dlg <sup>SH3-GUK,<math>\Delta</math>HOOK</sup> | Fragment encompassing aa597-678+771-975         |
| pMT-Ed-GFP-Dlg <sup>SH3-GUK</sup>                         | Fragment encompassing aa568-975                 |
| pMT-Ed-GFP-Dlg <sup>PDZ3-SH3-HOOK</sup>                   | Fragment encompassing aa473-784+961-975         |
| pMT-Ed-GFP-Dlg <sup>SH3</sup>                             | Fragment encompassing aa597-678+766-783+961-975 |
| pMT-Ed-GFP-Dlg <sup>HOOK</sup>                            | Fragment encompassing aa473-485+671-784+961-975 |
| pMT-Ed-GFP-Dlg <sup>SH3-HOOK</sup>                        | Fragment encompassing aa473-485+564-784+961-975 |
| pMT-Ed-GFP-Dlg <sup>PDZ3-SH3-HOOK-GUK[m30]</sup>          | L608→P                                          |
| pMT-Ed-GFP-Dlg <sup>PDZ3-SH3-HOOK-GUK[ASAKA]</sup>        | RSVKF 675-679 to ASAKA                          |
| pMT-Ed-GFP-Dlg <sup>PDZ3-SH3-HOOK-GUK[ASVKF]</sup>        | RSVKF 675-679 to ASVKF                          |
| pMT-Ed-GFP-Dlg <sup>PDZ3-SH3-HOOK-GUK[RSAKF]</sup>        | RSVKF 675-679 to RSAKF                          |
| pMT-Ed-GFP-Dlg <sup>PDZ3-SH3-HOOK-GUK[RSVKA]</sup>        | RSVKF 675-679 to RSVKA                          |
| pMT-Ed-GFP-Dlg <sup>PDZ3-SH3-HOOK-GUK[RSAKA]</sup>        | RSVKF 675-679 to RSAKA                          |
| pMT-Ed-GFP-Dlg <sup>PDZ3-SH3-HOOK-GUK[AEAV]</sup>         | YEAV774-777 to AEAV                             |
| pMT-Ed-GFP-Dlg <sup>PDZ3-SH3-HOOK-GUK[AEAA]</sup>         | YEAV774-777 to AEAA                             |
| pMT-Ed-GFP-Dlg <sup>PDZ3-SH3-HOOK-GUK[AAAA]</sup>         | YEAV774-777 to AAAA                             |
| pMT-Ed-GFP-Dlg <sup>PDZ3-SH3-HOOK-GUK[AAN]</sup>          | EEN768-770 to AAN                               |
| pMT-Ed-GFP-Dlg <sup>PDZ3-SH3-HOOK-GUK[AAW]</sup>          | EWV641-643 to AAW                               |
| pMT-Ed-GFP-Scrib <sup>LRR+LAPSD</sup>                     | Fragment encompassing aa1-715                   |

**Table S3. List of genotypes used in Figures**

| Figure  | Genotype                                                                                 |
|---------|------------------------------------------------------------------------------------------|
| Fig. 1B | hsFLP[122]/+;+/UAS-Dlg[WT>::HA;act>y+>GAL4,UAS-his2av::mRFP/+                            |
| Fig. 1C | hsFLP[122]/+;+/UAS-Dlg[ASAKA>::HA;act>y+>GAL4,UAS-his2av::mRFP/+                         |
| Fig. 1D | hsFLP[122]/+;UAS-scrib RNAi 39073/UAS-Dlg[WT>::HA;act>y+>GAL4,UAS-his2av::mRFP/+         |
| Fig. 1E | hsFLP[122]/+;UAS-scrib RNAi 39073/UAS-Dlg[ASAKA>::HA;act>y+>GAL4,UAS-his2av::mRFP/+      |
| Fig. 1G | d174-GAL4,dlg[40.2]/+                                                                    |
| Fig. 1H | d174-GAL4,dlg[40.2]/Y                                                                    |
| Fig. 1I | d174-GAL4,dlg[40.2]/Y;+/UAS-Dlg[WT>::HA                                                  |
| Fig. 1J | d174-GAL4,dlg[40.2]/Y;+/UAS-Dlg[ASAKA>::HA                                               |
| Fig. 1K | hsFLP[1],FRT19A tub-GAL80/dlg[m52],FRT19A;act-GAL4,UAS-GFP/+                             |
| Fig. 1L | hsFLP[1],FRT19A tub-GAL80/dlg[m52],FRT19A;act-GAL4,UAS-GFP/UAS-Dlg[WT>::HA               |
| Fig. 1M | hsFLP[1],FRT19A tub-GAL80/dlg[m52],FRT19A;act-GAL4,UAS-GFP/UAS-Dlg[ASAKA>::HA            |
| Fig. 2A |                                                                                          |
| Fig. 2C | hsFLP[122]/+;+/UAS-Lgl::GFP;act>y+>GAL4,UAS-his2av::mRFP/+                               |
| Fig. 2D | hsFLP[122]/+;UAS-dlg RNAi 39035/UAS-Lgl::GFP;act>y+>GAL4,UAS-his2av::mRFP/+              |
| Fig. 2E | hsFLP[122]/+;+/UAS-Lgl[KAFA>::GFP;act>y+>GAL4,UAS-his2av::mRFP/+                         |
| Fig. 2F | hsFLP[122]/+;UAS-dlg RNAi 39035/UAS-Lgl[KAFA>::GFP;act>y+>GAL4,UAS-his2av::mRFP/+        |
| Fig. 4A | TJ-GAL4/UAS-Dlg[WT>::HA                                                                  |
| Fig. 4B | TJ-GAL4/UAS-Dlg[SH3-HOOK-GUK>::HA                                                        |
| Fig. 4C | TJ-GAL4/UAS-Dlg[SH3-HOOK>::HA                                                            |
| Fig. 4E | d174-GAL4,dlg[40.2]/+                                                                    |
| Fig. 4F | d174-GAL4,dlg[40.2]/Y                                                                    |
| Fig. 4G | d174-GAL4,dlg[40.2]/Y;+/UAS-Dlg[SH3-HOOK-GUK>::HA                                        |
| Fig. 4H | d174-GAL4,dlg[40.2]/Y;+/UAS-Dlg[SH3-HOOK>::HA                                            |
| Fig. 4I | hsFLP[122]/+;UAS-dlg RNAi 39035/+;act>y+>GAL4,UAS-his2av::mRFP/+                         |
| Fig. 4J | hsFLP[122]/+;UAS-dlg RNAi 39035/UAS-Dlg[SH3-HOOK-GUK>::HA;act>y+>GAL4,UAS-his2av::mRFP/+ |
| Fig. 4K | hsFLP[122]/+;UAS-dlg RNAi 39035/UAS-Dlg[SH3-HOOK-GUK>::HA;act>y+>GAL4,UAS-his2av::mRFP/+ |
| Fig. 4M | hsFLP[122]/+;UAS-dlg RNAi 39035/+;act>y+>GAL4,UAS-his2av::mRFP/+                         |
| Fig. 4N | hsFLP[122]/+;UAS-dlg RNAi 39035/UAS-Dlg[SH3-HOOK-GUK>::HA;act>y+>GAL4,UAS-his2av::mRFP/+ |
| Fig. 4O | hsFLP[122]/+;UAS-dlg RNAi 39035/UAS-Dlg[SH3-HOOK-GUK>::HA;act>y+>GAL4,UAS-his2av::mRFP/+ |
| Fig. 5A | hsFLP[1],FRT19A tub-GAL80/dlg[m52],FRT19A;act-GAL4,UAS-GFP/+                             |
| Fig. 5B | hsFLP[1],FRT19A tub-GAL80/dlg[m52],FRT19A;act-GAL4,UAS-GFP/UAS-Dlg[WT>::HA               |
| Fig. 5C | hsFLP[1],FRT19A tub-GAL80/dlg[m52],FRT19A;act-GAL4,UAS-GFP/UAS-Dlg[ASAKA>::HA            |
| Fig. 5E | hsFLP[1],FRT19A tub-GAL80/dlg[m52],FRT19A;act-GAL4,UAS-GFP/+                             |
| Fig. 5F | hsFLP[1],FRT19A tub-GAL80/dlg[m30],FRT19A;act-GAL4,UAS-GFP/+                             |

|            |                                                                                        |
|------------|----------------------------------------------------------------------------------------|
| Fig. 5G    | hsFLP[1],FRT19A tub-GAL80/dlg[m52],FRT19A;act-GAL4,UAS-GFP/UAS-myr-Scrib::V5           |
| Fig. 5H    | hsFLP[1],FRT19A tub-GAL80/dlg[m52],FRT19A;act-GAL4,UAS-GFP/UAS-myr-Scrib::V5           |
| Fig. S1A,C | TJ-GAL4/+                                                                              |
| Fig. S1B,D | TJ-GAL4/+;+/UAS-Pp1-87B RNAi 32414                                                     |
| Fig. S1F   | hsFLP[122]/+;UAS-dlg RNAi 39035/+;act>y+>GAL4,UAS-his2av::mRFP/+                       |
| Fig. S1G   | hsFLP[122]/+;UAS-dlg RNAi 39035/+;act>y+>GAL4,UAS-his2av::mRFP/UAS-Pp1-87B::HA         |
| Fig. S2B   | hsFLP[122]/+;+/UAS-myr-Scrib::V5;act>y+>GAL4,UAS-his2av::mRFP/+                        |
| Fig. S2C   | hsFLP[122]/+;+/UAS-myr-Scrib[TAAA/RAGA]::V5;act>y+>GAL4,UAS-his2av::mRFP/+             |
| Fig. S2E   | d174-GAL4/+;scrib[2]/+                                                                 |
| Fig. S2F   | d174-GAL4/+;scrib[2]/scrib[1]                                                          |
| Fig. S2G   | d174-GAL4/+;scrib[2]/scrib[1];+/UAS-myr-Scrib::V5                                      |
| Fig. S2H   | d174-GAL4/+;scrib[2]/scrib[1];+/UAS-myr-Scrib[TAAA/RAGA]::V5                           |
| Fig. S2I   | hsFLP/+;act-GAL4,UAS-GFP/UAS-myr-Scrib::V5;tub-GAL80,FRT82B/scrib[1],FRT82B            |
| Fig. S2J   | hsFLP/+;act-GAL4,UAS-GFP/UAS-myr-Scrib[TAAA/RAGA]::V5;tub-GAL80,FRT82B/scrib[1],FRT82B |
| Fig. S4A   | hh-GAL4/+                                                                              |
| Fig. S4B   | +/UAS-dlg RNAi 39035;hh-GAL4/+                                                         |
| Fig. S4C   | UAS-dlg RNAi 39035/UAS-Dlg[SH3-HOOK-GUK]::HA;hh-GAL4/+                                 |
| Fig. S4D   | UAS-dlg RNAi 39035/UAS-Dlg[SH3-HOOK]::HA;hh-GAL4/+                                     |
| Fig. S6A   | hsFLP[122]/+;UAS-scrib RNAi 39073/lgl[S5A]::GFP;act>y+>GAL4,UAS-his2av::mRFP/+         |
| Fig. S6B   | hsFLP[122]/+;UAS-dlg RNAi 39035/lgl[S5A]::GFP;act>y+>GAL4,UAS-his2av::mRFP/+           |

### Supplemental References

- Bilder, D. and Perrimon, N.** (2000). Localization of apical epithelial determinants by the basolateral PDZ protein Scribble. *Nature* **403**, 676–680.
- Dong, W., Zhang, X., Liu, W., Chen, Y. jiu, Huang, J., Austin, E., Celotto, A. M., Jiang, W. Z., Palladino, M. J., Jiang, Y., et al.** (2015). A conserved polybasic domain mediates plasma membrane targeting of Lgl and its regulation by hypoxia. *J. Cell Biol.* **211**, 273–286.
- Garcia, J. D., Dewey, E. B. and Johnston, C. A.** (2014). Dishevelled binds the Discs large “Hook” domain to activate GukHolder-dependent spindle positioning in *Drosophila*. *PLoS One* **9**, 1–17.
- Johnston, C. A., Hirono, K., Prehoda, K. E. and Doe, C. Q.** (2009). Identification of an Aurora-A/PinsLINKER/ Dlg Spindle Orientation Pathway using Induced Cell Polarity in S2 Cells. *Cell* **138**, 1150–1163.
- Khoury, M. J. and Bilder, D.** (2020). Distinct activities of Scrib module proteins organize epithelial polarity. *Proc. Natl. Acad. Sci.* **117**, 11531–11540.
- Koh, Y. H., Popova, E., Thomas, U., Griffith, L. C. and Budnik, V.** (1999). Regulation of DLG localization at synapses by CaMKII-dependent phosphorylation. *Cell* **98**, 353–363.
- Lee, T. and Luo, L.** (1999). Mosaic analysis with a repressible cell marker for studies of gene function in neuronal morphogenesis. *Neuron* **22**, 451–61.
- Mendoza-Topaz, C., Urra, F., Barría, R., Albornoz, V., Ugalde, D., Thomas, U., Gundelfinger, E. D., Delgado, R., Kukuljan, M., Sanxaridis, P. D., et al.** (2008). DLGS97/SAP97 is developmentally upregulated and is required for complex adult behaviors and synapse morphology and function. *J. Neurosci.* **28**, 304–314.
- Moreira, S., Osswald, M., Ventura, G., Gonçalves, M., Sunkel, C. E. and Morais-de-Sá, E.** (2019). PP1-Mediated Dephosphorylation of Lgl Controls Apical-basal Polarity. *Cell Rep.* **26**, 293–301.
- Perrimon, N.** (1988). The maternal effect of lethal(1)discs-large-1: A recessive oncogene of *Drosophila melanogaster*. *Dev. Biol.* **127**, 392–407.
- Sharp, K. A., Khoury, M. J., Wirtz-Peitz, F. and Bilder, D.** (2021). Evidence for a nuclear role for *Drosophila* Dlg as a regulator of the NURF complex. *Mol. Biol. Cell* **32**,.
- Tanimoto, H., Itoh, S., Ten Dijke, P. and Tabata, T.** (2000). Hedgehog creates a gradient of DPP activity in *Drosophila* wing imaginal discs. *Mol. Cell* **5**, 59–71.
- Wirtz-Peitz, F., Nishimura, T. and Knoblich, J. A.** (2008). Linking Cell Cycle to Asymmetric Division: Aurora-A Phosphorylates the Par Complex to Regulate Numb Localization. *Cell* **135**, 161–173.
- Woods, D. F. and Bryant, P. J.** (1989). Molecular cloning of the lethal(1)discs large-1 oncogene of *Drosophila*. *Dev. Biol.* **134**, 222–235.
- Zeitler, J., Hsu, C. P., Dionne, H. and Bilder, D.** (2004). Domains controlling cell polarity and proliferation in the *Drosophila* tumor suppressor scribble. *J. Cell Biol.* **167**, 1137–1146.
